# Supplementary material for: Associations Between Engagement With an Online Health Community and Changes in Patient Activation and Health Care Utilization: Longitudinal Web-Based Survey
Source: PubMed Central journal article supplement (PMC6740167; doi:10.2196/13477), 2019-08-29
Supplement: jmir_v21i8e13477_app3.pdf [file jmir_v21i8e13477_app3.pdf]

Baseline and follow-up patient activation levels

|                            |       | Baseline PAM |           |            |           |                       |
|----------------------------|-------|--------------|-----------|------------|-----------|-----------------------|
|                            |       | 1            | 2         | 3          | 4         | Total N<br>(Column %) |
| Follow-up PAM<br>N (row %) | 1     | 9 (2.9)      | 4 (1.3)   | 0 (0)      | 0 (0)     | 13 (4.1)              |
|                            | 2     | 6 (1.9)      | 34 (10.8) | 17 (5.4)   | 3 (1)     | 60 (19.1)             |
|                            | 3     | 7 (2.2)      | 45 (14.3) | 113 (36)   | 19 (6.1)  | 184 (58.6)            |
|                            | 4     | 0 (0)        | 1 (0.3)   | 25 (8)     | 31 (9.9)  | 57 (18.2)             |
|                            | Total | 22 (7)       | 84 (26.8) | 155 (49.4) | 53 (16.9) | 314 (100)             |

Shading key: green = increased PAM level, white = stable PAM level, red = decreased PAM level
