# Supplementary material for: Associations Between Engagement With an Online Health Community and Changes in Patient Activation and Health Care Utilization: Longitudinal Web-Based Survey
Source: PubMed Central journal article supplement (PMC6740167; doi:10.2196/13477), 2019-08-29

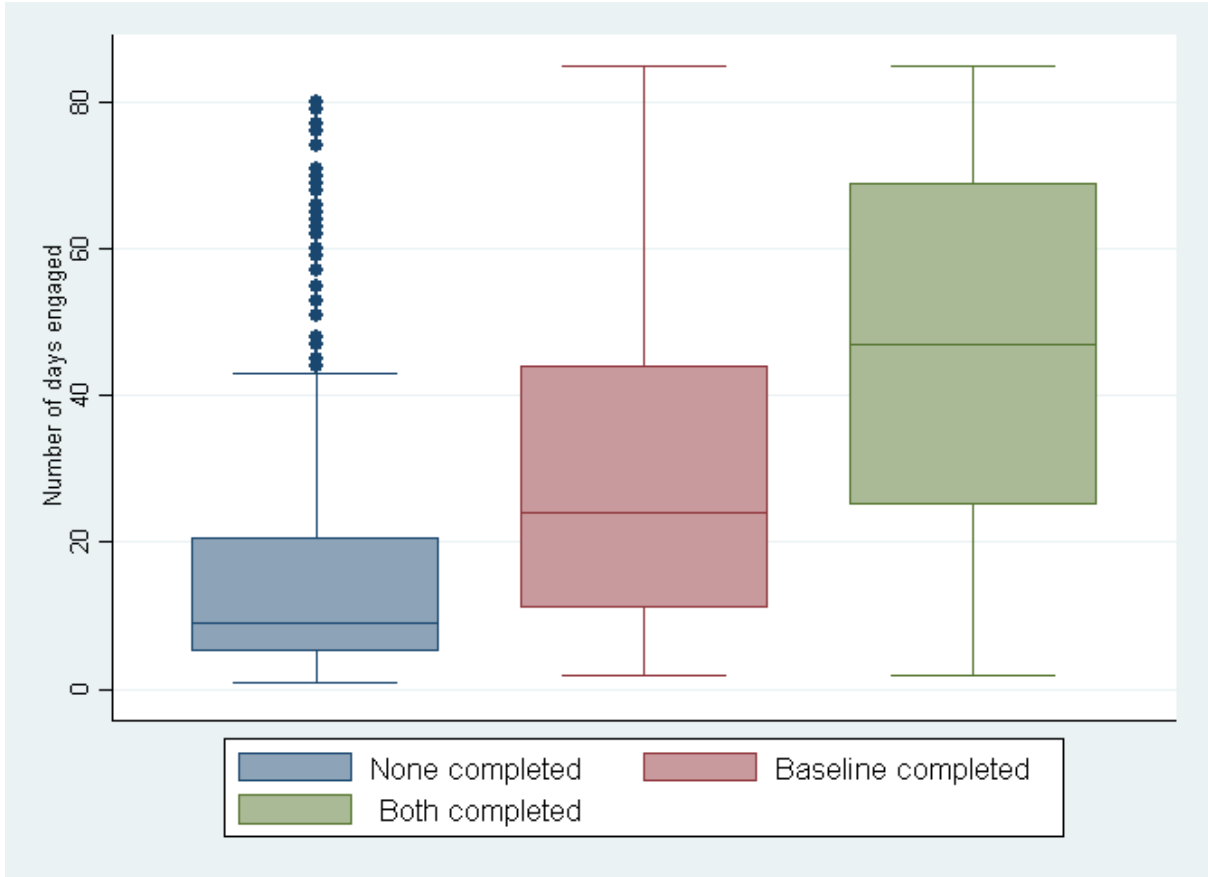

Supplement: jmir_v21i8e13477_app4.pdf [file jmir_v21i8e13477_app4.pdf]
